# Supplementary material
Source: Springer Nature journal article supplement (https://www.springermedizin.de/resource/supplementary/12963_2008_77_MOESM2_ESM.pdf/9572642)

A

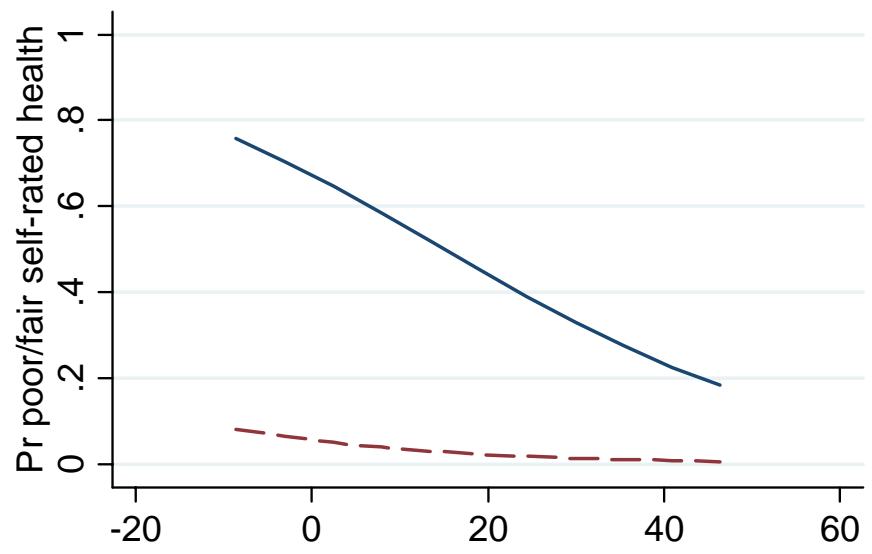

B

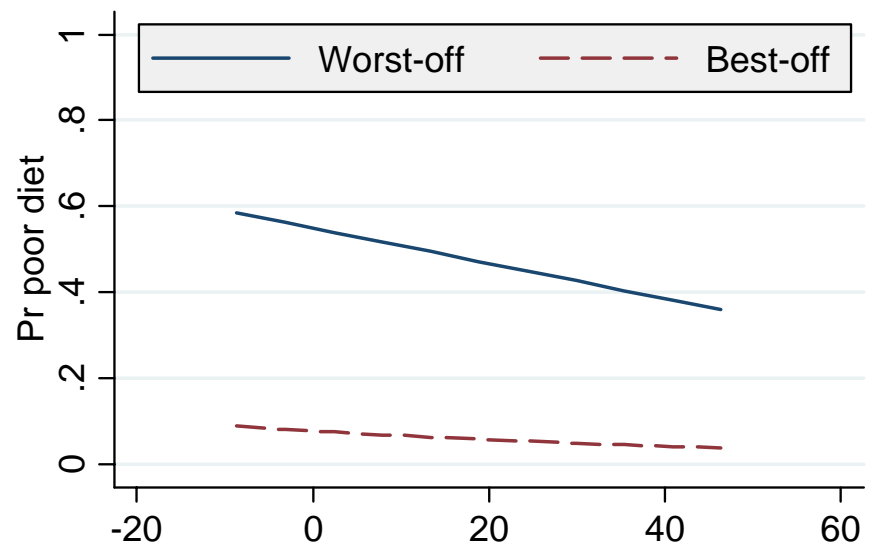

C

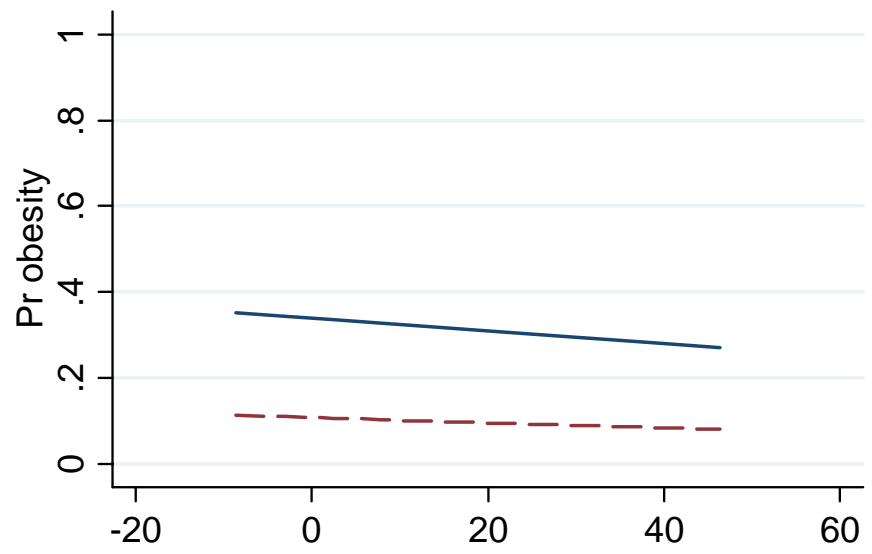

D

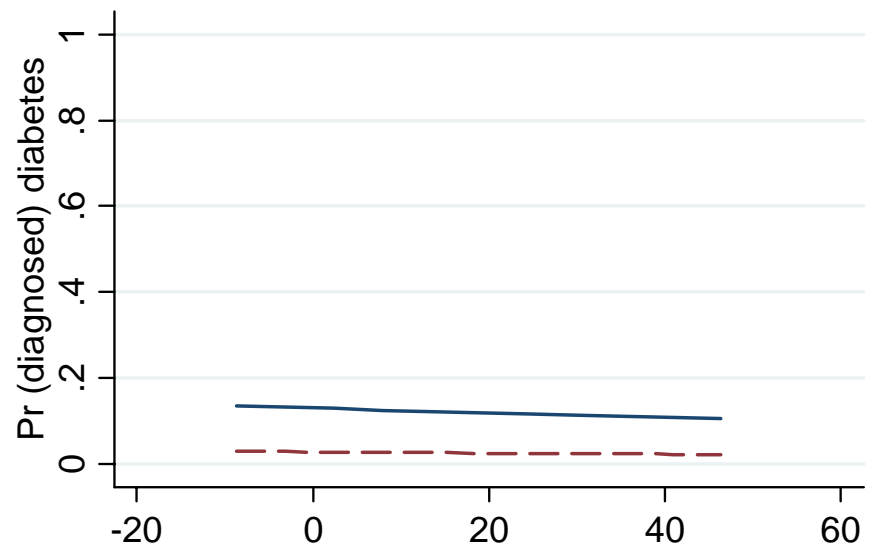

Supplement: MOESM2 [file 9572642]
